# Supplementary material for: Genetic Engineering of Klebsiella pneumoniae ATCC 25955 for Bioconjugate Vaccine Applications
Source: MDPI journal article supplement (doi:10.3390/microorganisms11051321), 2023-05-17
Supplement: s1 [file s1]

A.

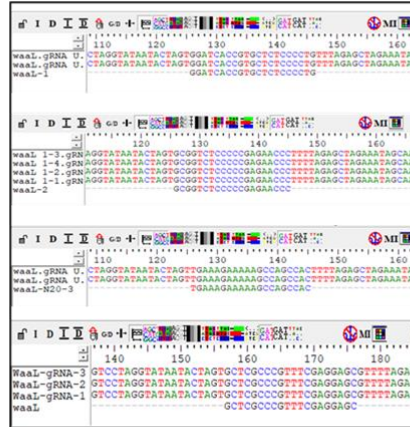

B.

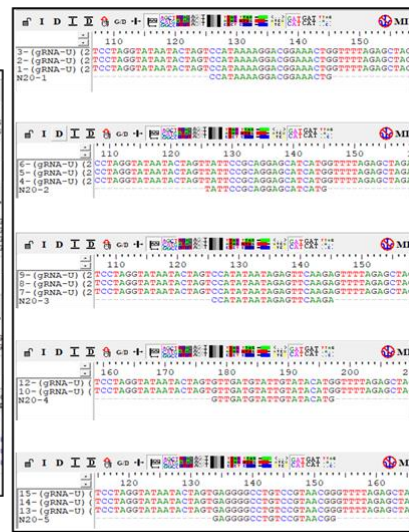

C.

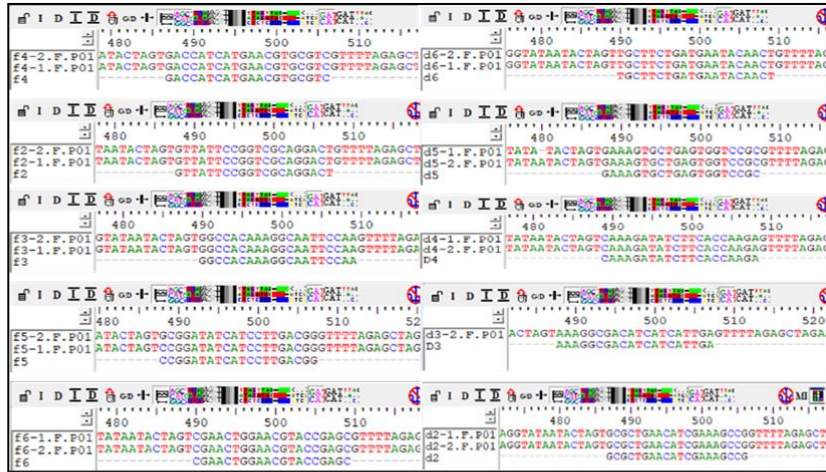

D.

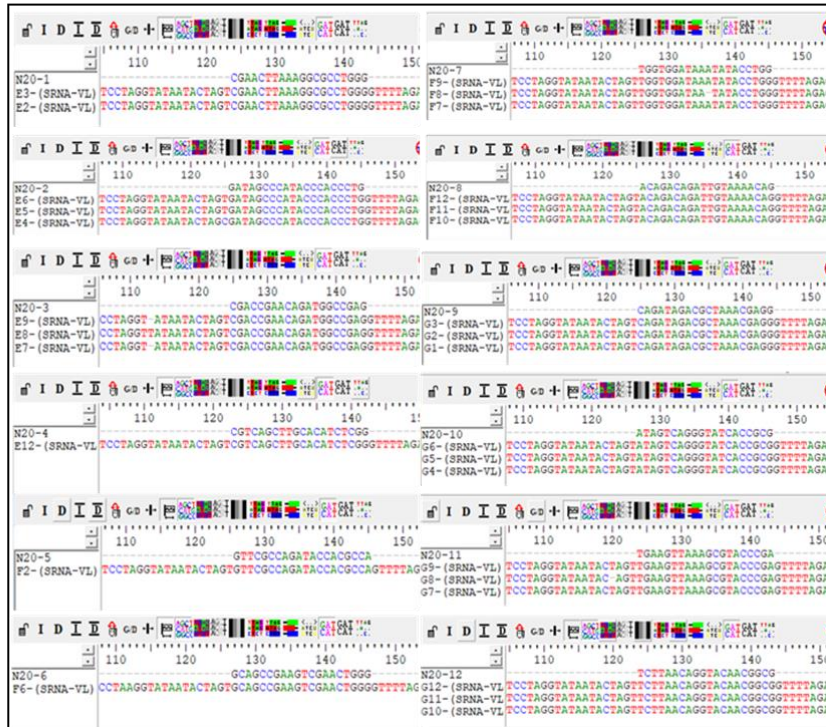

**Supplemental Figure S1. Sequencing validation of each pTargetF-N20 plasmids.**

- (A) Validation of each N20 sites for *waaL* gene.
- (B) Validation of each N20 sites for the *wbbY-Z* gene cluster.
- (C) Validation of each N20 sites for the CPS gene cluster.
- (D) Validation of each N20 sites for the ECA gene cluster.
