# Supplementary material for: Genetic Engineering of Klebsiella pneumoniae ATCC 25955 for Bioconjugate Vaccine Applications
Source: Microorganisms. 2023 May 17;11(5):1321. doi: 10.3390/microorganisms11051321 (PMC10222708; doi:10.3390/microorganisms11051321)
Supplement: Supplementary file 1 [file microorganisms-11-01321-s001.zip › microorganisms-2357089-Supplementary-Table S1.xlsx]

## Sheet: Sheet1
Supplementary Table S1. Primers
Name	Primer
CRISPR
pTF-U	5'-CGCAGCCGAACGACCGAGCGCA-3'
pTF-D	5'-AAGCTTCTGCAGGTCGACTC-3'
pCas-U	5'-AGGTTCTGGGAAATACAG-3
pCas-D	5'-ACTTGCGTTAATAGGGTT-3'
N20-R	5'-CCAGGTCTCAGGACTGAGCTAGCTGTCAAGGATCCAGCATATGCGG-3'
waaL gene deletion
25955-waaL-AF	5'-CAACAAAAGTGGATACCCTCGTCA-3'
25955-waaL-AR	5'-CACCAGGTCTCACCATGCCAGTCGGCGGGTTCGTCCGTC-3'
25955-waaL-BF	5'-CACCAGGTCTCA ATGG GCTATGGCAGGCGTGGCGCAAGC-3'
25955-waaL-BR	5'-GCCGTAGAAGTGATCCGCAGCTG-3'
waaL-N20-F1	5'-CCAGGTCTCAGTCCTAGGTATAATACTAGT GGATCACCGTGCTCTCCCCTGGTTTTAGAGCTAGAA-3'
waaL-N20-F2	5'-CCAGGTCTCAGTCCTAGGTATAATACTAGT GCGGTCTCCCCCGAGAACCCGTTTTAGAGCTAGAA-3'
waaL-N20-F3	5'-CCAGGTCTCAGTCCTAGGTATAATACTAGT TGAAAGAAAAAGCCAGCCACGTTTTAGAGCTAGAA-3'
waaL-N20-F4	5'-CCAGGTCTCAGTCCTAGGTATAATACTAGT GCTCGCCCGTTTCGAGGAGCGTTTTAGAGCTAGAA-3'
waaL-CF	5'-CAACAAAAGTGGATACCCTCGTCA-3'
waaL-CR	5'-GCCGTAGAAGTGATCCGCAGCTG-3'
waaL-NF	5'-CGCTGCACCTGCACGTCTT-3'
waaL-NR	5'-GCTCGCCGCTGTAGTTGATG-3'
CPS gene deletion
25955-CPS-AF	5'-TACGACTGCGGTATGTGTTACCACGATCATG-3'
25955-CPS-AR	5'-CACCAGGTCTCA ACCG ATTCATCTTCACCTGTTTGGTTGCAAAACACGC-3'
25955-CPS-BF	5'-CACCAGGTCTCA CGGT ACCGAGTGGTTGGAATAATCTTTATATACCACA
25955-CPS-BR	5'-GGTACGGGGTGTGGGCGCTGTCGGTGAGGG-3'
CPS-N20-F1	5'-CCAGGTCTCAGTCCTAGGTATAATACTAGT GTTATTCCGGTCGCAGGACTGTTTTAGAGCTAGAA-3'
CPS-N20-F2	5'-CCAGGTCTCAGTCCTAGGTATAATACTAGT GGCCACAAAGGCAATTCCAAGTTTTAGAGCTAGAA-3'
CPS-N20-F3	5'-CCAGGTCTCAGTCCTAGGTATAATACTAGT GACCATCATGAACGTGCGTCGTTTTAGAGCTAGAA-3'
CPS-N20-F4	5'-CCAGGTCTCAGTCCTAGGTATAATACTAGT CCGGATATCATCCTTGACGGGTTTTAGAGCTAGAA-3'
CPS-N20-F5	5'-CCAGGTCTCAGTCCTAGGTATAATACTAGT CGAACTGGAACGTACCGAGCGTTTTAGAGCTAGAA-3'
CPS-N20-F6	5'-CCAGGTCTCAGTCCTAGGTATAATACTAGT GCGCTGAACATCGAAAGCCGGTTTTAGAGCTAGAA-3'
CPS-N20-F7	5'-CCAGGTCTCAGTCCTAGGTATAATACTAGT AAAGGCGACATCATCATTGAGTTTTAGAGCTAGAA-3'
CPS-N20-F8	5'-CCAGGTCTCAGTCCTAGGTATAATACTAGT CAAAGATATCTTCACCAAGAGTTTTAGAGCTAGAA-3'
CPS-N20-F9	5'-CCAGGTCTCAGTCCTAGGTATAATACTAGT GAAAGTGCTGAGTGGTCCGCGTTTTAGAGCTAGAA-3'
CPS-N20-F10	5'-CCAGGTCTCAGTCCTAGGTATAATACTAGT TGCTTCTGATGAATACAACTGTTTTAGAGCTAGAA-3'
CPS-CF	5'-ATGGTCGGGTGGCTGTTA-3'
CPS-CR	5'-AGGTGGAAAGTGGCGAAGTA-3'
CPS-NF	5'-TAGATATTGTCGGCACTGGTCC-3'
CPS-NR	5'-ATTTTTTTCTCAAGCAAAATA-3'
ECA gene cluster deletion
25955-ECA-AF	5'-GCTTTATTTTTGGCTCGTGGGAACTGG-3'
25955-ECA-AR	5'-CACCAGGTCTCAGTGCCACATCCCCAGCTCTACTTGGTTAGTTTC-3'
25955-ECA-BR	5'-GAGTGGCCGCCGTTGCCAAAGCCGAAGAA-3'
ECA-N20-F1	5'-CCAGGTCTCAGTCCTAGGTATAATACTAGT CGAACTTAAAGGCGCCTGGGGTTTTAGAGCTAGAA-3'
ECA-N20-F2	5'-CCAGGTCTCAGTCCTAGGTATAATACTAGT GATAGCCCATACCCACCCTGGTTTTAGAGCTAGAA-3'
ECA-N20-F3	5'-CCAGGTCTCAGTCCTAGGTATAATACTAGT CGACCGAACAGATGGCCGAGGTTTTAGAGCTAGAA-3'
ECA-N20-F4	5'-CCAGGTCTCAGTCCTAGGTATAATACTAGT CGTCAGCTTGCACATCTCGGGTTTTAGAGCTAGAA-3'
ECA-N20-F5	5'-CCAGGTCTCAGTCCTAGGTATAATACTAGT GTTCGCCAGATACCACGCCAGTTTTAGAGCTAGAA-3'
ECA-N20-F6	5'-CCAGGTCTCAGTCCTAGGTATAATACTAGT GCAGCCGAAGTCGAACTGGGGTTTTAGAGCTAGAA-3'
ECA-N20-F7	5'-CCAGGTCTCAGTCCTAGGTATAATACTAGT TGGTGGATAAATATACCTGGGTTTTAGAGCTAGAA-3'
ECA-N20-F8	5'-CCAGGTCTCAGTCCTAGGTATAATACTAGT ACAGACAGATTGTAAAACAGGTTTTAGAGCTAGAA-3'
ECA-N20-F9	5'-CCAGGTCTCAGTCCTAGGTATAATACTAGT CAGATAGACGCTAAACGAGGGTTTTAGAGCTAGAA-3'
ECA-N20-F10	5'-CCAGGTCTCAGTCCTAGGTATAATACTAGT ATAGTCAGGGTATCACCGCGGTTTTAGAGCTAGAA-3'
ECA-N20-F11	5'-CCAGGTCTCAGTCCTAGGTATAATACTAGT TGAAGTTAAAGCGTACCCGAGTTTTAGAGCTAGAA-3'
ECA-N20-F12	5'-CCAGGTCTCAGTCCTAGGTATAATACTAGT TCTTAACAGGTACAACGGCGGTTTTAGAGCTAGAA-3'
ECA-CF	5'-TTTTTGTCGCGCGGAAAGTGGCAAAAAAGATCGGGTTAGT-3'
ECA-CR	5'-GGAAAGCGCTGCCGTCAGCACCACGAAGTTGATAATTC-3'
wbbY-Z gene deletion
25955-wbbY-Z-AF	5'-AAACACACCGGATTTACTGTCTGGAAA-3'
25955-wbbY-Z-AR	5'-CACCAGGTCTCAGCACTAATATTCGGGGCCCGAAAGGGCTC-3'
25955-wbbY-Z-BF	5'-CACCAGGTCTCAGCACCTATTCATTCGCACGCCTATAGTCT-3'
25955-wbbY-Z-BR	5'-CCGAGAGTTCGAAGATTTATATGCTTTC-3'
wbbY-Z-N20-F1	5'-CCAGGTCTCAGTCCTAGGTATAATACTAGTCCATAAAAGGACGGAAACTGGTTTTAGAGCTAGAA-3'
wbbY-Z-N20-F2	5'-CCAGGTCTCAGTCCTAGGTATAATACTAGTTATTCCGCAGGAGCATCATGGTTTTAGAGCTAGAA-3'
wbbY-Z-N20-F3	5'-CCAGGTCTCAGTCCTAGGTATAATACTAGTCCATATAATAGAGTTCAAGAGTTTTAGAGCTAGAA-3'
wbbY-Z-N20-F4	5'-CCAGGTCTCAGTCCTAGGTATAATACTAGTGTTGATGTATTGTATACATGGTTTTAGAGCTAGAA-3'
wbbY-Z-N20-F5	5'-CCAGGTCTCAGTCCTAGGTATAATACTAGTGAGGGGCCTGTCCGTAACGGGTTTTAGAGCTAGAA-3'
wbbY-Z-N20-F6	5'-CCAGGTCTCAGTCCTAGGTATAATACTAGTCAATACCGACAGGCTGCATGGTTTTAGAGCTAGAA3-3'
wbbY-Z-CF	5'-AGGAGGTACTGAAACAAAAGTTCTGAGGCCGGCT-3'
wbbY-Z-CR	5'-CTGCATCGTAAGCGCGAATGGCGGCGATGATGCA-3'
